# Supplementary material for: Is the risk of progressive multifocal leukoencephalopathy the real reason for natalizumab discontinuation in patients with multiple sclerosis?
Source: PubMed Central journal article supplement (PMC5391008; doi:10.1371/journal.pone.0174858), 2017-04-13
Supplement: pone.0174858.s003.pdf [file pone.0174858.s003.pdf]

|                              | Group A<br>(JCV Ab -) | Group B<br>(JCV Ab +,<br>IMS -, NTZ ≤<br>24 months) | Group C<br>(JCV Ab +,<br>IMS -, NTZ ><br>24 months) |
|------------------------------|-----------------------|-----------------------------------------------------|-----------------------------------------------------|
| Azathioprine                 | 4                     | 0                                                   | 0                                                   |
| Fingolimod                   | 16                    | 14                                                  | 1                                                   |
| Glatiramer acetate           | 77                    | 42                                                  | 35                                                  |
| Immunoglobulin               | 3                     | 3                                                   | 2                                                   |
| Interferon beta-1a           | 154                   | 55                                                  | 64                                                  |
| Interferon beta-1b           | 66                    | 26                                                  | 22                                                  |
| Mitoxantrone                 | 10                    | 0                                                   | 0                                                   |
| No Therapy                   | 40                    | 20                                                  | 9                                                   |
| Plasmapheresis               | 1                     | 0                                                   | 0                                                   |
| Natalizumab                  | 2                     | 0                                                   | 0                                                   |
| Steroid pulse therapy        | 1                     | 0                                                   | 0                                                   |
| Pegylated interferon beta-1a | 0                     | 1                                                   | 0                                                   |
| Fumaric Acid                 | 0                     | 1                                                   | 0                                                   |
