# Supplementary material for: Is the risk of progressive multifocal leukoencephalopathy the real reason for natalizumab discontinuation in patients with multiple sclerosis?
Source: PubMed Central journal article supplement (PMC5391008; doi:10.1371/journal.pone.0174858), 2017-04-13
Supplement: pone.0174858.s004.pdf [file pone.0174858.s004.pdf]

|                                                               | Relationship between SAEs and NTZ treatment | Severity        | Outcome                        | Impact on NTZ treatment    |
|---------------------------------------------------------------|---------------------------------------------|-----------------|--------------------------------|----------------------------|
| <b>Multiple sclerosis relapses</b><br>(N = 14)                | unrelated                                   | severe          | recovered with sequelae        | no action taken            |
|                                                               | unrelated                                   | severe          | not recovered                  | stopped temporarily        |
|                                                               | unrelated                                   | moderate        | recovered                      | stopped temporarily        |
|                                                               | unrelated                                   | moderate        | recovered                      | stopped temporarily        |
|                                                               | unrelated                                   | moderate        | recovered                      | withdrawn                  |
|                                                               | unrelated                                   | moderate        | recovered with sequelae        | no action taken            |
|                                                               | unrelated                                   | mild            | recovered                      | no action taken            |
|                                                               | unrelated                                   | mild            | recovered with sequelae        | stopped permanently        |
|                                                               | unrelated                                   | mild            | not recovered                  | stopped temporarily        |
|                                                               | unrelated                                   | unknown         | recovered                      | no action taken            |
|                                                               | unrelated                                   | unknown         | recovered                      | no action taken            |
|                                                               | unrelated                                   | unknown         | recovered                      | no action taken            |
|                                                               | unrelated                                   | unknown         | recovered with sequelae        | no action taken            |
|                                                               | unknown                                     | unknown         | unknown                        | stopped temporarily        |
| <b>Cardiac disorders</b><br>(N = 5)                           | <b>related</b>                              | <b>severe</b>   | <b>recovered</b>               | <b>stopped permanently</b> |
|                                                               | <b>related</b>                              | <b>severe</b>   | <b>recovered</b>               | <b>stopped permanently</b> |
|                                                               | unrelated                                   | severe          | recovered                      | stopped permanently        |
|                                                               | unrelated                                   | severe          | recovered with sequelae        | no action taken            |
|                                                               | unrelated                                   | severe          | recovered with sequelae        | no action taken            |
| <b>Infections</b><br>(N = 2)                                  | unrelated                                   | unknown         | not recovered                  | stopped permanently        |
|                                                               | unknown                                     | moderate        | recovered with sequelae        | stopped temporarily        |
| <b>Neurological disorders</b><br>(N = 3)                      | <b>related</b>                              | <b>unknown</b>  | <b>not recovered</b>           | <b>withdrawn</b>           |
|                                                               | unrelated                                   | mild            | not recovered                  | stopped permanently        |
|                                                               | unknown                                     | unknown         | recovered                      | stopped permanently        |
| <b>PML</b> (N = 3)                                            | <b>related</b>                              | <b>severe</b>   | <b>not recovered</b>           | <b>stopped permanently</b> |
|                                                               | <b>related</b>                              | <b>moderate</b> | <b>not recovered</b>           | <b>stopped permanently</b> |
|                                                               | <b>related</b>                              | <b>unknown</b>  | <b>recovered with sequelae</b> | <b>stopped permanently</b> |
| <b>Immune reconstitution inflammatory syndrome</b><br>(N = 3) | <b>related</b>                              | <b>unknown</b>  | <b>recovered with sequelae</b> | <b>stopped permanently</b> |
|                                                               | <b>related</b>                              | <b>unknown</b>  | <b>not recovered</b>           | <b>stopped permanently</b> |
|                                                               | unknown                                     | unknown         | not recovered                  | stopped permanently        |
| <b>Allergic reactions</b><br>(N = 2)                          | <b>related</b>                              | <b>severe</b>   | <b>recovered</b>               | <b>stopped permanently</b> |
|                                                               | unknown                                     | severe          | recovered                      | stopped permanently        |
| <b>Neoplasms</b><br>(N = 2)                                   | unknown                                     | severe          | not recovered                  | stopped temporarily        |
|                                                               | unknown                                     | unknown         | recovered                      | stopped permanently        |
| <b>Pregnancy complications</b><br>(N = 2)                     | unknown                                     | unknown         | recovered                      | no action taken            |
|                                                               | unknown                                     | unknown         | unknown                        | withdrawn                  |
| <b>Progression of multiple sclerosis</b> (N = 2)              | <b>related</b>                              | <b>severe</b>   | <b>not recovered</b>           | <b>withdrawn</b>           |
|                                                               | unrelated                                   | unknown         | recovered                      | no action taken            |
| <b>Acute renal failure</b> (N = 1)                            | unrelated                                   | unknown         | not recovered                  | stopped permanently        |
| <b>Autonomic dysfunction</b><br>(N = 1)                       | <b>related</b>                              | <b>moderate</b> | <b>recovered</b>               | <b>stopped permanently</b> |
| <b>Depressive symptom aggravated</b> (N = 1)                  | unrelated                                   | moderate        | not recovered                  | no action taken            |
| <b>Femoral neck fracture</b>                                  | unrelated                                   | severe          | recovered                      | no action taken            |

|                                          |           |         |                            |                     |
|------------------------------------------|-----------|---------|----------------------------|---------------------|
| (N = 1)                                  |           |         | with sequelae              |                     |
| <b>Hypoxic brain damage</b><br>(N = 1)   | unrelated | severe  | fatal                      | stopped permanently |
| <b>Postoperative bleeding</b><br>(N = 1) | unrelated | severe  | recovered                  | stopped permanently |
| <b>Retinal detachment</b><br>(N = 1)     | unknown   | unknown | recovered<br>with sequelae | no action taken     |
| <b>Sinus tachycardia</b> (N = 1)         | unrelated | severe  | recovered<br>with sequelae | no action taken     |
