# Supplementary material for: Is the risk of progressive multifocal leukoencephalopathy the real reason for natalizumab discontinuation in patients with multiple sclerosis?
Source: PubMed Central journal article supplement (PMC5391008; doi:10.1371/journal.pone.0174858), 2017-04-13
Supplement: pone.0174858.s005.pdf [file pone.0174858.s005.pdf]

|         | Patients continuing NTZ |       |       | Patients discontinuing NTZ |       |       |
|---------|-------------------------|-------|-------|----------------------------|-------|-------|
|         | A                       | B     | C     | A                          | B     | C     |
| Visit 1 | 8.64                    | 12.67 | 11.40 | 11.57                      | 13.72 | 11.53 |
| Visit 2 | 9.21                    | 13.02 | 11.92 | 12.22                      | 12.67 | 12.37 |
| Visit 3 | 9.52                    | 14.01 | 12.37 | 12.70                      | 14.89 | 10.89 |
| Visit 4 | 9.24                    | 13.43 | 12.70 | 14.05                      | 15.25 | 16.73 |
| Visit 5 | 9.70                    | 13.43 | 12.95 | 13.00                      | 14.71 | 14.47 |
