# Supplementary material for: Is the risk of progressive multifocal leukoencephalopathy the real reason for natalizumab discontinuation in patients with multiple sclerosis?
Source: PubMed Central journal article supplement (PMC5391008; doi:10.1371/journal.pone.0174858), 2017-04-13
Supplement: pone.0174858.s007.pdf [file pone.0174858.s007.pdf]

|                                                                             | Standard deviation | <i>z</i> | <i>p</i> |
|-----------------------------------------------------------------------------|--------------------|----------|----------|
| Patients' evaluation of personal PML risk                                   | 0.04               | 2.69     | 0.007    |
| Duration of natalizumab therapy                                             | 0.44               | -0.84    | 0.40     |
| Physicians' last opinion on continuation/<br>discontinuation of natalizumab | 0.03               | 6.10     | < 0.001  |
| Total number of relapses during the course of study                         | 0.29               | 0.86     | 0.39     |
| JCV seroconversion during the course of the study                           | 0.56               | 2.04     | 0.04     |
| Number of treated MS patients per year                                      | 0.001              | -0.52    | 0.60     |
| Physicians' evaluation of PML risk in general                               | 0.047              | 1.74     | 0.08     |
