# Supplementary material for: Is the risk of progressive multifocal leukoencephalopathy the real reason for natalizumab discontinuation in patients with multiple sclerosis?
Source: PLoS One. 2017 Apr 13;12(4):e0174858. doi: 10.1371/journal.pone.0174858 (PMC5391008; doi:10.1371/journal.pone.0174858)
Supplement: S4 Table — Physicians assessed the general PML risk as low and mainly voted for treatment continuation on a VAS from 0 to 25 points (SD = standard deviation). (PDF) [file pone.0174858.s006.pdf]

|         | PML risk in general<br>[Mean (SD)] | opinion on continuation/ discontinuation<br>of NTZ [Mean (SD)] |
|---------|------------------------------------|----------------------------------------------------------------|
| Visit 1 | 7.80 (5.10)                        | 5.10 (4.02)                                                    |
| Visit 2 | 8.32 (5.27)                        | 5.08 (3.58)                                                    |
| Visit 3 | 8.49 (5.08)                        | 5.21 (3.82)                                                    |
| Visit 4 | 8.83 (4.89)                        | 5.73 (4.95)                                                    |
| Visit 5 | 7.96 (4.91)                        | 7.19 (6.39)                                                    |
